# Supplementary material for: Cost-effectiveness of pharmacist care for managing hypertension in Canada
Source: PubMed Central journal article supplement — Can Pharm J (Ott). 2017 Mar 21;150(3):184–97. doi: 10.1177/1715163517701109 (PMC5415065; doi:10.1177/1715163517701109), 2017-03-21
Supplement: CPH701109_French_Text.pdf [file CPH701109_French_Text.pdf]

# Rapport coût-efficacité d'une intervention des pharmaciens dans la prise en charge de l'hypertension au Canada

Carlo Marra, PharmD, PhD; Karissa Johnston, MSc, PhD; Valerie Santschi, PharmD, PhD; Ross T. Tsuyuki, BSc(Pharm.), PharmD, MSc, FCSHP, FACC

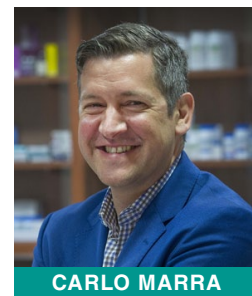

CARLO MARRA

*Nous avons mené cette étude, car il y a de solides preuves des avantages de l'intervention des pharmaciens en matière d'hypertension, mais peu de données sur la rentabilité de cette pratique.*

## RÉSUMÉ

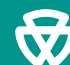

**Contexte :** Plus de la moitié des cas de cardiopathie et d'accident vasculaire cérébral sont attribuables à l'hypertension, laquelle est associée à environ 10 % des coûts médicaux directs dans le monde. Des données d'essais cliniques ont démontré que les bienfaits d'une intervention des pharmaciens, qui comprend l'éducation, la consultation et/ou la prescription, peuvent aider à réduire la tension artérielle. Selon un essai canadien récent, l'éducation et la prescription par les pharmaciens sont associées à une réduction de 18,3 mm Hg de la tension artérielle systolique. L'objectif de la présente étude était d'évaluer l'incidence économique d'une telle intervention dans un contexte canadien.

**Méthodologie :** Un modèle markovien de rapport coût-efficacité a été conçu pour extrapoler les différences potentielles entre les résultats à long terme pour les maladies cardiovasculaires et rénales, au moyen des équations de risque de Framingham et d'autres équations de risque publiées. Pour la réduction de la tension artérielle systolique, une plage de valeurs (7,6 à 18,3 mm Hg)

a permis de refléter l'ampleur des interventions potentielles et les données connues. Les résultats pour la santé, les coûts et la qualité de vie ont été intégrés au modèle aux fins d'estimation d'un rapport coût/efficacité différentiel global. Ont été pris en compte les coûts médicaux directs de même que les coûts associés à la mise en œuvre de la stratégie d'intervention des pharmaciens.

**Résultats :** Pour une réduction de 18,3 mm Hg de la tension artérielle systolique, l'effet estimatif est de 0,21 manifestation cardiovasculaire de moins par personne et, actualisé à un taux de 5 % par année, de 0,3 année de vie supplémentaire, de 0,4 année supplémentaire de vie pondérée par la qualité et de 6364 \$ en économies de coûts durant toute une vie. L'intervention est donc dominante sur le plan économique, étant à la fois plus efficace et moins coûteuse par rapport aux soins habituels.

**Discussion :** Dans diverses analyses de sensibilité simples (à un facteur) et probabilistes des paramètres et hypothèses clés, l'intervention des pharmaciens est demeurée efficace et moins coûteuse.

**Conclusion :** La prestation de soins pharmaceutiques complets pour l'hypertension, comprenant l'éducation des patients et la prescription, peut se traduire par des bienfaits pour la santé et par des économies de coûts pour les Canadiens, et a donc d'importantes répercussions sur la santé publique. *Can Pharm J (Ott)* 2017;150:xx-xx.

## MISE EN PRATIQUE DES CONNAISSANCES

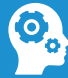

- Dans le cas de l'hypertension, l'intervention des pharmaciens (partielle ou complète) constitue une stratégie de prise en charge efficace.
- Les pharmaciens sont les mieux placés pour combler les lacunes dans le traitement des 35 à 65 % de patients qui souffrent d'une hypertension artérielle mal contrôlée.
- La prise en charge complète de l'hypertension (ordonnances, éducation et consultations) par les pharmaciens est une stratégie dominante (permet de faire des économies et améliore les résultats).
- La prise en charge partielle par les pharmaciens améliore les résultats de façon rentable en général.
- Compte tenu des arguments économiques qui appuient la prise en charge de l'hypertension par les pharmaciens, il leur appartient de mettre en œuvre ce type de traitement dans notre société.

### Introduction

L'hypertension est le principal facteur de risque de morbidité et de mortalité prématurées dans le monde<sup>1</sup>. Elle touche 1,13 milliard de personnes (prévalence d'environ 24 %), selon les estimations<sup>2</sup>, et cause quelque 7,5 millions de décès par année<sup>3</sup>. En outre, l'hypertension n'est pas suffisamment traitée ni maîtrisée, plus de 40 % des patients ayant une tension artérielle encore trop élevée<sup>4</sup>, signe d'une lacune considérable dans les soins qui exige une nouvelle façon de penser pour remédier au problème. Au Canada, la situation est pourtant meilleure que dans la plupart des pays. Le taux de prévalence de l'hypertension y est de 23 % chez les adultes, et la maîtrise est inadéquate chez le tiers d'entre eux<sup>5</sup>. Toutefois, comme l'hypertension est un facteur de risque majeur de maladie cardiovasculaire, de néphropathie et de mortalité, il est extrêmement souhaitable de réduire cette lacune dans les soins pour prévenir de nombreux cas de morbidité et de mortalité<sup>6-8</sup>.

Les pharmaciens sont des professionnels de la santé très accessibles, qui sont très bien placés pour aider à pallier cette lacune dans les soins de prise en charge de l'hypertension et qui ont prouvé qu'ils peuvent le faire efficacement. Santschi et ses collègues<sup>9</sup> ont récemment procédé à une revue systématique et méta-analyse de 39 essais contrôlés à répartition aléatoire visant à évaluer l'effet des interventions des pharmaciens sur la prise en charge de l'hypertension. Ces interventions ont surtout été faites sous forme d'éducation et de conseils auprès des patients, de commentaires aux médecins sur la prise en charge (notamment

pour des problèmes liés aux médicaments, des recommandations sur un changement de pharmacothérapie et l'élaboration d'un plan de soins) et de gestion des médicaments (dont la surveillance et l'ajustement des doses ou le changement de médicaments). L'étude de Santschi et ses collègues a révélé que par rapport aux soins habituels, les interventions des pharmaciens ont été beaucoup plus efficaces pour abaisser la tension artérielle diastolique et systolique, cette dernière étant réduite en moyenne de 7,6 mm Hg<sup>9</sup>.

Plus récemment, Tsuyuki et ses collègues ont mené un essai contrôlé à répartition aléatoire chez des patients<sup>10</sup> vivant dans la collectivité pour évaluer en quoi la prescription de médicaments par les pharmaciens influe sur la maîtrise de la tension artérielle. L'intervention des pharmaciens comprenait, pour le groupe qui en a bénéficié, une évaluation de la tension artérielle et du risque de maladie cardiovasculaire (MCV), une éducation sur l'hypertension, la prescription de médicaments antihypertenseurs, un suivi par des épreuves de laboratoire de même que des visites mensuelles pendant 6 mois. Pour le groupe témoin, le pharmacien et le médecin ont remis du matériel éducatif, pris des mesures de la tension artérielle et administré les soins habituels. Chez les 248 patients recrutés, ceux du groupe ayant bénéficié de l'intervention ont obtenu une réduction cliniquement importante de tous les biomarqueurs pertinents, dont une baisse de 18,3 mm Hg de la tension artérielle systolique.

Bien que de solides données d'essais contrôlés à répartition aléatoire témoignent des bienfaits d'une prise en charge de l'hypertension par les pharmaciens, il n'existe pas de données quantitatives montrant que la prestation de tels services vaut l'argent qu'il faudrait y consacrer dans un contexte de ressources financières limitées pour les soins de santé. C'est pourquoi nous avons entrepris une étude afin d'extrapoler les bienfaits observés au cours des essais où les pharmaciens sont intervenus dans la maîtrise de la tension artérielle, et d'établir des prévisions sur les possibles effets cliniques et rapports coût-efficacité des interventions des pharmaciens sur un horizon temporel plus long.

### Méthodologie

#### Structure du modèle

Le modèle a été structuré sous forme de modèle de Markov à 5 états, dans lequel les états de santé étaient définis par antécédents de MCV et/ou de néphropathie terminale et de décès (Figure 1). Dans

**FIGURE 1** (a) Approche globale pour la structure du modèle et (b) états de santé dans le modèle de Markov

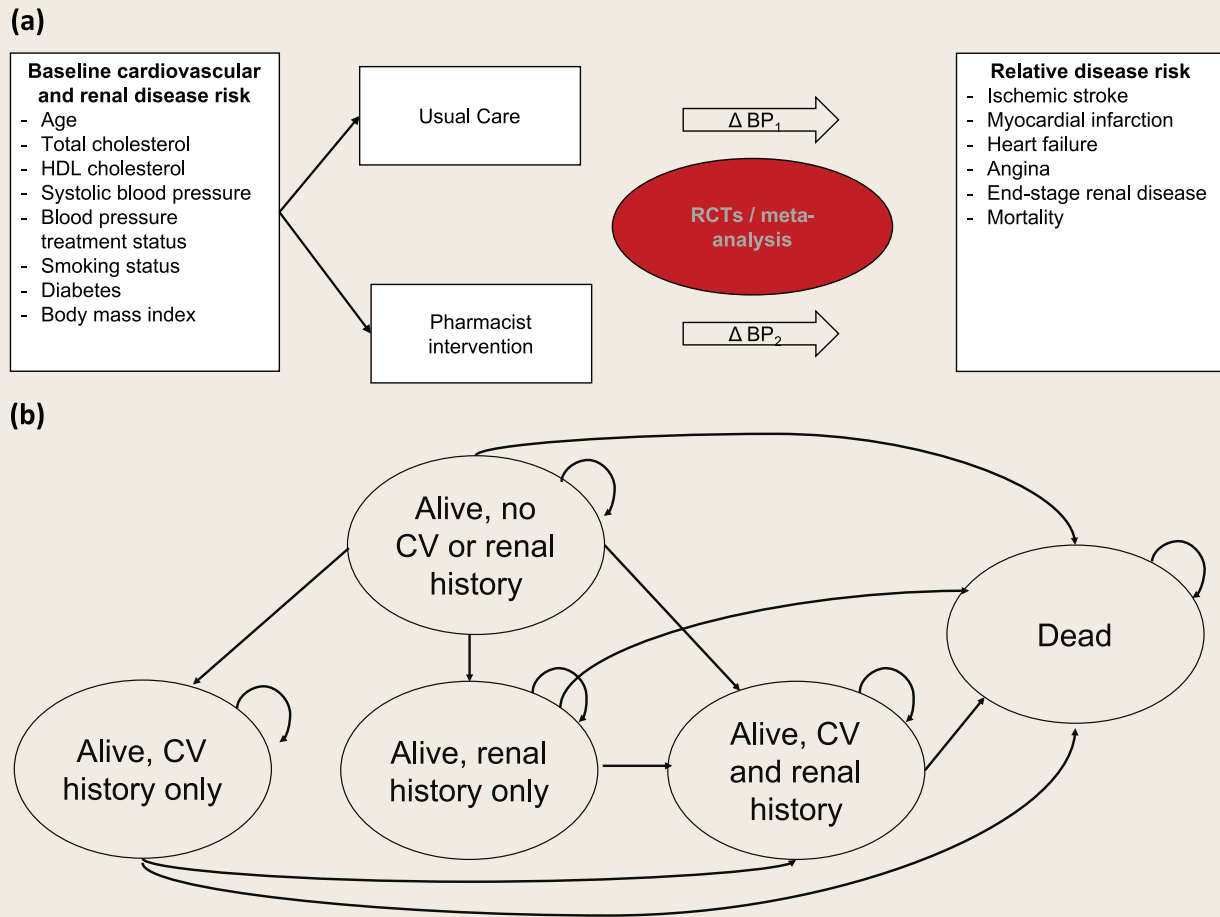

le modèle, le risque initial de MCV et de néphropathie terminale était défini selon les caractéristiques cliniques et démographiques des patients et, dans le groupe bénéficiant de l'intervention des pharmaciens, était modifié par suite des variations de la tension artérielle systolique. Les résultats pour la MCV et la néphropathie terminale ont été suivis au fil du temps, en plus de la survie, de la qualité de vie liée à la santé et des coûts médicaux directs correspondants. Les résultats pris en compte pour la MCV ont été l'infarctus du myocarde (IM), l'accident vasculaire cérébral (AVC), l'insuffisance cardiaque et l'angine. L'horizon temporel modélisé était de 30 ans dans le scénario de référence, et un taux d'actualisation annuel de 5 % a été appliqué aux coûts et aux résultats. L'analyse a été réalisée du point de vue d'un tiers payeur.

#### *Effet de l'intervention des pharmaciens*

L'effet de l'intervention des pharmaciens a été caractérisé par une réduction de la tension

artérielle systolique chez les personnes atteintes d'hypertension. La valeur de 18,3 mm Hg utilisée dans le scénario de référence, tirée de l'essai clinique de Tsuyuki et ses collègues<sup>10</sup>, reflète le résultat observé après 6 mois pour une intervention comprenant une consultation, une revue des médicaments et la prescription d'antihypertenseurs (appelée « intervention de pleine portée par les pharmaciens », car elle couvre tout le champ d'exercice des pharmaciens). Une valeur de 7,6 mm Hg a aussi été considérée, d'après la revue systématique et méta-analyse de la littérature effectuée par Santschi et ses collègues<sup>9</sup> sur différents types d'interventions excluant, la plupart du temps, la prescription de médicaments par les pharmaciens (appelée « intervention de portée partielle par les pharmaciens »).

Dans le modèle, il est supposé que le groupe recevant les soins habituels restera comme au début, sans variation de la tension artérielle, du fait que les soins habituels consisteraient en soins

**TABEAU 1** Caractéristiques présumées des patients pour l'intervention des pharmaciens dans la prise en charge de l'hypertension, d'après la population observée au cours de l'essai clinique de Tsuyuki *et al.*<sup>10</sup>

| Caractéristique                        | Valeur |
|----------------------------------------|--------|
| Âge (années)                           | 63,5   |
| Sexe (% d'hommes)                      | 48,8   |
| Tension artérielle systolique (mm Hg)  | 149,5  |
| Tension artérielle diastolique (mm Hg) | 83,7   |
| Traitement pour l'hypertension (%)     | 77,8   |
| Tabagisme (%)                          | 16,5   |
| Diabète sucré (%)                      | 44,0   |
| Indice de masse corporelle             | 32,0   |

uniformes, sans la moindre intervention supplémentaire, et qu'en l'absence d'intervention, aucune baisse de la tension artérielle ne serait attendue. L'hypothèse d'une non-variation de la tension artérielle représente un résultat moyen, soit des élévations et des réductions au fil du temps chez un patient, mais n'indique pas une tendance constante en l'absence d'autre intervention. Point à noter pour l'essai de Tsuyuki et ses collègues, le groupe « témoin » a reçu une intervention modifiée, de sorte qu'il n'est pas un miroir fidèle du contexte des soins habituels réellement dispensés sans autre intervention, et ses résultats n'ont pas été considérés comme une description appropriée de ceux-ci. En raison de l'importance de cette hypothèse, les résultats sont présentés sous forme graphique pour diverses valeurs plausibles de réduction de la tension artérielle systolique, allant de 5 à 20 mm Hg.

#### Résultats pour la santé au fil du temps

Le risque initial de maladie est basé sur les caractéristiques cliniques et démographiques observées dans le cadre de l'essai clinique de Tsuyuki et ses collègues<sup>10</sup> (Tableau 1). Les équations de risque de Framingham sur 30 ans ont servi à générer les probabilités de MCV à long terme pour les caractéristiques initiales, y compris des facteurs d'étalonnage pour différencier le risque de coronaropathie, d'AVC et d'insuffisance cardiaque<sup>11,12</sup>. Le risque d'angine a été extrapolé à partir de la différence absolue des scores de risque pour les résultats « tangibles » (excluant l'angine) et tous les résultats (incluant

l'angine) sur les MCV, tandis que le risque d'IM a été extrapolé à partir de la différence entre le risque de coronaropathie et le risque d'angine. Des calculateurs de risque fournis par les chercheurs de Framingham<sup>13</sup> ont servi à calculer les scores de risque de MCV chaque année pendant 30 ans pour chaque groupe de traitement, d'après les facteurs de risque initiaux. La différence entre les groupes recevant les soins habituels et bénéficiant de l'intervention a été fondée sur la relation entre la tension artérielle systolique et les manifestations cardiovasculaires majeures publiée par la Blood Pressure Lowering (BPL) Treatment Trialists' Collaboration<sup>14</sup>. Après numérisation du diagramme décrivant cette relation, un modèle de régression linéaire simple y a été ajusté et a révélé que le risque relatif de MCV diminue de 0,026 pour chaque baisse de 1 mm Hg de la tension artérielle systolique, par rapport à une non-variation. Le risque relatif de MCV résultant pour le groupe qui bénéficiait de l'intervention des pharmaciens par rapport au groupe qui recevait les soins habituels a été de 0,50 avec l'intervention de pleine portée par les pharmaciens et de 0,77 avec l'intervention de portée partielle par les pharmaciens.

Le risque de néphropathie terminale a été calculé à partir des taux d'incidence signalés au cours d'une étude de cohortes historique aux États-Unis<sup>15</sup>. Dans le cadre de cette étude, l'incidence de néphropathie terminale est présentée selon les catégories du septième rapport du Joint National Committee on Prevention, Detection, Evaluation and Treatment of

High Blood Pressure (JNC 7) : tension artérielle normale, préhypertension, hypertension de stade 1 et hypertension de stade 2<sup>16</sup>. Pour que la relation avec la tension artérielle systolique puisse être interpolée sur une échelle continue, un modèle de régression linéaire simple a été ajusté entre la tension artérielle systolique médiane pour chaque catégorie et l'incidence résultante de néphropathie terminale par 100 000 années-personnes. Le taux de néphropathie terminale par 100 000 années-personnes a ensuite été converti en un risque annuel, selon l'hypothèse d'une fonction exponentielle. La probabilité annuelle résultante de néphropathie terminale a été de 0,000194 pour les soins habituels, de 0,000150 pour l'intervention de pleine portée par les pharmaciens et de 0,000191 pour l'intervention de portée partielle par les pharmaciens. Les probabilités annuelles respectives de maladie pour chaque groupe de traitement ont été appliquées chaque année.

Pour le groupe bénéficiant de l'intervention des pharmaciens, la différence de tension artérielle systolique associée à l'intervention a servi à calculer des prévisions de risque modifiées à long terme pour la MCV et la néphropathie terminale. Tous les facteurs de risque, sauf la tension artérielle systolique, ont été maintenus constants. L'annexe supplémentaire contient d'autres détails sur les méthodes de modélisation pour la MCV et la néphropathie terminale.

La mortalité par âge et par sexe en fonction du temps a été estimée au moyen des tables de survie canadiennes. Un rapport des risques instantanés de mortalité de 1,71 a été appliqué après l'apparition d'une MCV, de manière à tenir compte de la mortalité accrue dans la population de patients concernés<sup>17</sup>.

#### *Qualité de vie liée à la santé*

La qualité de vie liée à la santé a été quantifiée pour les états de santé d'intérêt au moyen d'un catalogue publié de valeurs d'utilité EQ-5D, avec l'hypothèse que des valeurs d'utilité calculées pour une population des États-Unis seraient pertinentes au Canada<sup>18</sup>. Les utilités résultantes ont été de 0,694 pour l'AVC, de 0,725 pour l'IM, de 0,636 pour l'insuffisance cardiaque, de 0,709 pour l'angine et de 0,708 pour la néphropathie terminale (Tableau 2). De plus, un décrétement d'utilité de 0,00029 par année a été appliqué pour toutes les années de vie au-delà de 70 ans (p. ex., pour les personnes survivant jusqu'à l'âge de 75

ans, décrétement d'années de vie pondérées par la qualité [QALY] de  $0,00029 \times 5 = 0,00145$ )<sup>18</sup>.

#### *Coûts*

Le coût de l'intervention des pharmaciens vient d'hypothèses tirées des connaissances des chercheurs sur la mise en œuvre de tels programmes dans un contexte d'essais cliniques. Il a été supposé que les patients seraient vus 6 fois la première année et tous les 3 mois par la suite, ce qui représente un protocole de visites mensuelles jusqu'à l'atteinte des valeurs cibles à 2 visites consécutives, puis de visites à des intervalles de 3 mois. Le coût unitaire est de 125 \$ CA pour la première consultation de chaque année et de 25 \$ pour les consultations subséquentes, ce qui correspond au barème d'honoraires actuel en Alberta<sup>19</sup>. Bien qu'il n'y ait eu aucune différence nette quant au nombre d'antihypertenseurs utilisés pendant l'essai clinique<sup>20</sup>, l'hypothèse prudente formulée dans le scénario de référence a été que l'intervention ferait augmenter les coûts des médicaments de 30 \$ par mois. Il a aussi été présumé qu'il n'y aurait aucune différence pour les autres coûts médicaux de fond; l'hypothèse est prudente, car pour le groupe bénéficiant de l'intervention, les consultations additionnelles des pharmaciens remplaceraient probablement des visites chez les médecins pour la gestion des médicaments. Tous les aspects du programme d'intervention font partie des compétences de base actuelles des pharmaciens canadiens et toute formation complémentaire, si elle était requise, serait vraisemblablement financée par la pharmacie plutôt que par un tiers payeur. Ainsi, le scénario de référence ne prévoit aucun coût de formation.

Les coûts de la MCV et de la néphropathie terminale proviennent d'une revue de la documentation publiée évaluée par des pairs, limitée aux études canadiennes (Tableau 2). Le volet canadien santé et soins personnels de l'indice des prix à la consommation a été utilisé pour la conversion en dollars canadiens de 2015<sup>21</sup>.

Les coûts médicaux non cardiovasculaires de fond ont été fixés, par hypothèse, à 6105 \$ par personne par année, soit la moyenne canadienne globale établie par l'Institut canadien d'information sur la santé (ICIS)<sup>22</sup>. La moyenne globale a été utilisée dans le scénario de référence au lieu des valeurs par âge, lesquelles, chez les personnes plus âgées, sont susceptibles d'inclure une part substantielle de coûts liés à la

**TABEAU 2** Paramètres et distributions du modèle de Markov

| Paramètre                                                                                                                    | Valeur      | Probabiliste                                         | Source                                                                     |
|------------------------------------------------------------------------------------------------------------------------------|-------------|------------------------------------------------------|----------------------------------------------------------------------------|
| Scénario de référence                                                                                                        |             |                                                      |                                                                            |
| Réduction de la tension artérielle systolique                                                                                | -18,3 mm Hg | Normal (-18,3, 1,2)<br>Normal (-7,6, 0,69)           | Tsuyuki <i>et al.</i> <sup>10</sup><br>Santschi <i>et al.</i> <sup>9</sup> |
| Risque relatif de maladie cardiovasculaire dans le groupe bénéficiant de l'intervention                                      | 0,50        | Normal (0,50, 0,02)                                  | BPL Treatment Trialists' Collaboration <sup>29</sup>                       |
| Risque relatif de néphropathie dans le groupe bénéficiant de l'intervention                                                  | 0,77        | Rapport : normal (2,6, 0,30)<br>/ Normal (1,6, 0,25) | Hsu <i>et al.</i> <sup>15</sup>                                            |
| Rapport des risques instantanés pour la mortalité après une maladie cardiovasculaire                                         | 1,7         | Lognormal (0,538, 0,075)                             | Pocock <i>et al.</i> <sup>17</sup>                                         |
| Coût de l'intervention du pharmacien                                                                                         |             |                                                      | Hypothèse                                                                  |
| Année 1                                                                                                                      | 200,00 \$   |                                                      |                                                                            |
| Année 2                                                                                                                      | 75,00 \$    |                                                      |                                                                            |
| Année 3 et suivantes+                                                                                                        | 50,00 \$    |                                                      |                                                                            |
| Coût de l'accident vasculaire cérébral                                                                                       |             |                                                      | Mittman <i>et al.</i> <sup>20</sup> , Sorensen <i>et al.</i> <sup>21</sup> |
| Année 1                                                                                                                      | 79 925 \$   | Gamma (197,02, 405,66)                               |                                                                            |
| Année 2 et suivantes                                                                                                         | 12 126 \$   | Gamma (25, 485,03)                                   |                                                                            |
| Coût par année d'insuffisance cardiaque                                                                                      | 13 240 \$   | Gamma (25, 529,6)                                    | Bentkover <i>et al.</i> <sup>22</sup>                                      |
| Coût par année d'angine                                                                                                      | 3764 \$     | Gamma (37,42, 100,58)                                | McGillion <i>et al.</i> <sup>23</sup>                                      |
| Coût de l'infarctus du myocarde                                                                                              |             |                                                      | Coyle <i>et al.</i> <sup>24</sup>                                          |
| Année 1                                                                                                                      | 11 511 \$   | Gamma (25, 460,46)                                   |                                                                            |
| Année 2 et suivantes                                                                                                         | 3367 \$     | Gamma (25, 134,68)                                   |                                                                            |
| Coût par année de néphropathie terminale                                                                                     | 66 837 \$   | Gamma (25, 2673,46)                                  | Manns <i>et al.</i> <sup>25</sup>                                          |
| Coûts médicaux de fond                                                                                                       | 6105 \$     |                                                      | ICIS <sup>26</sup>                                                         |
| Utilité                                                                                                                      |             |                                                      | Sullivan <i>et al.</i> <sup>18</sup>                                       |
| Population générale                                                                                                          | 0,867       |                                                      |                                                                            |
| Après un AVC                                                                                                                 | 0,694       | Bêta (7090, 3126)                                    |                                                                            |
| Après l'apparition d'insuffisance cardiaque                                                                                  | 0,636       | Bêta (480, 275)                                      |                                                                            |
| Après l'apparition d'angine                                                                                                  | 0,709       | Bêta (4843, 1988)                                    |                                                                            |
| Après un infarctus du myocarde                                                                                               | 0,725       | Bêta (61446, 23307)                                  |                                                                            |
| Après l'apparition d'une néphropathie terminale                                                                              | 0,708       | Bêta (1248, 515)                                     |                                                                            |
| Désutilité par année après l'âge de 70 ans                                                                                   | 0,00029     |                                                      |                                                                            |
| Analyses de sensibilité à un facteur                                                                                         |             |                                                      |                                                                            |
| Équations de risque sur 30 ans de Framingham pour l'effet de la tension artérielle                                           |             |                                                      | Pencina <i>et al.</i> <sup>12</sup>                                        |
| Réduction de la tension artérielle basée sur une intervention partielle                                                      |             |                                                      | Santschi <i>et al.</i> <sup>9</sup>                                        |
| Estimations des coûts de fond par âge                                                                                        |             |                                                      | ICIS <sup>22</sup>                                                         |
| Horizon temporel réduit (5 ans, 10 ans)                                                                                      |             |                                                      | Hypothèse                                                                  |
| Coûts doublés pour l'intervention des pharmaciens et coûts de formation ajoutés                                              |             |                                                      | Hypothèse                                                                  |
| Réduction des coûts médicaux de fond pour le groupe bénéficiant de l'intervention                                            |             |                                                      | Hypothèse                                                                  |
| Efficacité réduite de l'intervention des pharmaciens au fil du temps (effet diminué après 3 ans, effet diminué après 10 ans) |             |                                                      | Hypothèse                                                                  |
| Scénario « optimiste » concernant le coût d'une intervention de pleine portée                                                |             |                                                      | Hypothèse                                                                  |

MCV et amèneraient une double comptabilisation des coûts si elles étaient explicitement intégrées au modèle.

#### *Analyse de sensibilité*

Outre le scénario de référence et l'analyse de sensibilité principale de la différence de tension artérielle systolique avec une intervention complète ou partielle des pharmaciens, plusieurs autres analyses de sensibilité à un facteur ont été réalisées et sont énumérées au Tableau 2. Dans une analyse de sensibilité, l'effet de la tension artérielle systolique sur le risque de MCV a été évalué au moyen des équations de risque de Framingham plutôt qu'avec les équations de la BPL Treatment Trialists' Collaboration. Des horizons temporels plus courts (5 ans et 10 ans) ont été considérés. Le modèle comportait aussi une option d'atténuation des effets de l'intervention au fil du temps. Dans le scénario de référence, il a été présumé que les résultats observés au cours des essais seraient soutenus, et des analyses de sensibilité ont porté sur les scénarios suivants : 1) bienfaits de l'intervention diminués de 50 % après 3 ans et de 100 % (c.-à-d., efficacité équivalente dans les 2 groupes) après 10 ans; 2) bienfaits de l'intervention diminués de 100 % après 3 ans. Dans ces deux derniers scénarios, il a été supposé qu'une fois les bienfaits entièrement disparus, l'intervention cesserait aussi d'entraîner des coûts puisqu'elle serait arrêtée si elle n'était plus efficace.

Les conséquences de l'intervention sur les coûts ont également fait l'objet de plusieurs analyses de sensibilité. L'analyse du scénario de référence reposait sur l'hypothèse que les coûts médicaux de fond seraient identiques dans les 2 groupes. Dans une analyse de sensibilité, il a été présumé que les coûts médicaux de fond diminueraient de 100 \$ par année pour le groupe bénéficiant de l'intervention des pharmaciens, compte tenu du nombre potentiellement réduit de visites chez les omnipraticiens par suite des contacts avec les pharmaciens. Dans une analyse de sensibilité sur les coûts de l'intervention comme telle, les coûts de formation pour les praticiens ont été inclus et d'autres coûts liés à l'intervention ont été doublés. À un coût de 1000 \$ par participant par jour pour financer la séance et un programme de formation d'une demi-journée, calculé au prorata d'un nombre présumé de 15 patients par pharmacien, le coût résultant pour chaque participant a été de 33,33 \$.

Les mêmes coûts médicaux de fond annuels bruts ont été appliqués aux personnes de tous les âges dans le scénario de référence, et des valeurs par âge ont été appliquées dans l'analyse de sensibilité. S'y ajoute une analyse de sensibilité « optimiste », où il a été supposé qu'après la première année, seules 2 visites de suivi par année seraient nécessaires (comparativement aux visites tous les 3 mois dans le scénario de référence) et que, conformément aux résultats observés pendant les essais, il n'y aurait ni augmentation du nombre de médicaments ni hausse correspondante des coûts des médicaments dans le scénario de référence.

Une analyse de sensibilité probabiliste, avec variations simultanées de plages d'incertitude plausible pour tous les paramètres pertinents, a aussi permis d'évaluer l'effet sur l'économie et sur les résultats pour la santé. Des résultats d'analyses de sensibilité probabilistes distinctes ont été générés pour l'intervention de pleine portée par les pharmaciens et pour l'intervention de portée partielle par les pharmaciens. Les valeurs utilisées pour les paramètres dans l'analyse de sensibilité probabiliste sont énumérées au Tableau 2.

Enfin, des résultats clés ont été générés puis évalués par analyse graphique pour des réductions potentielles de la tension artérielle systolique allant de 5 à 20 mm Hg avec l'intervention. En plus des valeurs associées aux interventions de pleine portée et de portée partielle par les pharmaciens, des résultats clés ont été présentés pour une plage de réductions de la tension artérielle systolique allant de 5 à 20 mm Hg.

## **Résultats**

Le Tableau 1 décrit les caractéristiques de la population modélisée, fondées sur celles de la population de l'essai clinique de Tsuyuki et ses collègues<sup>10</sup>. L'âge moyen était de 63,5 ans et la proportion d'hommes, de 49 % (environ la moitié). La tension artérielle systolique moyenne était de 149,5 mm Hg, et 78 % des patients recevaient déjà un traitement antihypertenseur.

Les résultats pour la MCV et la néphropathie terminale dans le scénario de référence et les analyses de sensibilité principales au fil du temps sont illustrés à la Figure 2. Le terme « intervention de pleine portée par les pharmaciens » désigne la différence de 18,3 mm Hg par rapport aux soins habituels notée par Tsuyuki et ses collègues<sup>10</sup>, alors que le terme « intervention de portée partielle par les pharmaciens » représente la différence de

**FIGURE 2** Délai d'apparition d'une (a) maladie cardiovasculaire et effet de la tension artérielle d'après les équations de risque de la Blood Pressure Lowering Treatment Trialists' Collaboration; (b) maladie cardiovasculaire et effet de la tension artérielle d'après les équations de risque de Framingham; (c) néphropathie terminale

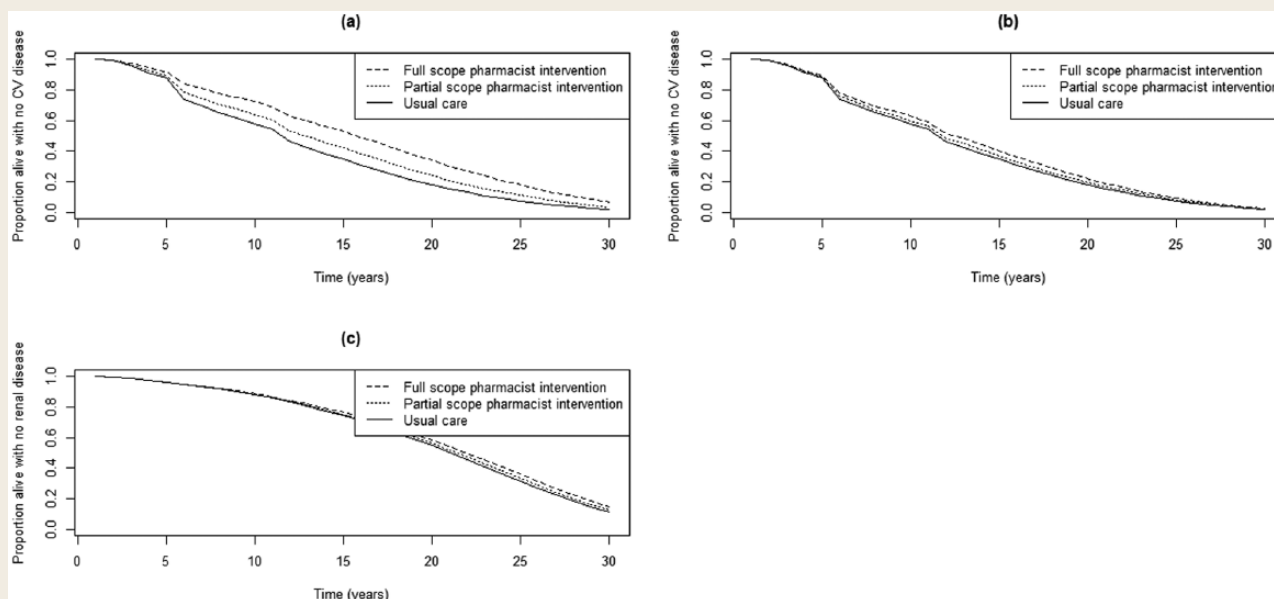

7,6 mm Hg par rapport aux soins habituels notée par Santschi et ses collègues<sup>9</sup>. Pour le scénario de référence, la Figure 2(a) correspond à l'effet d'une baisse de la tension artérielle sur la MCV, basé sur la relation publiée par la BPL Treatment Trialists' Collaboration, et la Figure 2(b) montre l'analyse de sensibilité faite à partir des équations de Framingham seulement. Dans toutes les analyses, les taux de MCV et de néphropathie terminale sont les plus bas pour l'intervention de pleine portée par les pharmaciens et les plus élevés pour les soins habituels. Les différences entre l'intervention des pharmaciens et les soins habituels sont moins marquées lorsque l'intervention des pharmaciens est de portée partielle, ou lorsque l'effet d'une baisse de la tension artérielle est mesuré avec les équations de Framingham.

Avec les paramètres du scénario de référence pour l'intervention de pleine portée par les pharmaciens, le risque de manifestation cardiovasculaire sur 30 ans diminue de 0,61 à 0,41, soit 2 manifestations cardiovasculaires de moins pour chaque tranche de 10 personnes recevant l'intervention (Tableau 3). Actualisée à un taux de 5 % par année, l'intervention de pleine portée par les pharmaciens est associée à 0,3 année de vie supplémentaire et à 0,4 QALY supplémentaire par rapport aux soins habituels. La réduction

des coûts associés à la MCV et à la néphropathie terminale a plus que compensé le coût de l'intervention comme telle, d'où des économies de coûts actualisées de 6365 \$ sur 30 ans par personne avec l'intervention de pleine portée comparativement aux soins habituels. L'intervention a été associée à des coûts accrus (actualisés) de 7145 \$ liés à l'intervention comme telle et à la hausse correspondante du coût des médicaments et à des coûts médicaux de fond de 1584 \$, ce qui a été compensé par une réduction de 14 002 \$ des coûts liés à la MCV et de 1092 \$ des coûts liés à la néphropathie chronique. L'intervention s'est donc révélée supérieure (c.-à-d., moins coûteuse et plus efficace) par rapport aux soins habituels. Dans les analyses de sensibilité probabilistes, 100 % des itérations sont demeurées dans le quadrant dominant du plan correspondant à un meilleur rapport coût-efficacité avec l'intervention de pleine portée par les pharmaciens (Figure 3). Pour l'intervention de portée partielle par les pharmaciens, 98 % des itérations ont été dans le quadrant du plan correspondant à de meilleurs résultats pour la santé et à des coûts accrus, et de ce nombre, 100 % étaient en deçà d'un rapport coût-efficacité seuil de 40 000 \$ par QALY.

Dans la plupart des analyses de sensibilité à un facteur, l'intervention des pharmaciens est

**TABEAU 3** Résultats du modèle de Markov pour l'intervention de pleine portée des pharmaciens dans la prise en charge de l'hypertension : scénario de référence et analyses de sensibilité

|                                                                                                           | Soins habituels | Intervention de pleine portée par les pharmaciens (réduction de 18,3 mm Hg de la tension artérielle systolique) | Différence                            |
|-----------------------------------------------------------------------------------------------------------|-----------------|-----------------------------------------------------------------------------------------------------------------|---------------------------------------|
| Cas de référence                                                                                          |                 |                                                                                                                 |                                       |
| Manifestations cardiovasculaires                                                                          | 0,61            | 0,40                                                                                                            | -0,21                                 |
| Cas de néphropathie terminale                                                                             | 0,0039          | 0,0031                                                                                                          | -0,0008                               |
| Années de vie                                                                                             |                 |                                                                                                                 |                                       |
| Actualisées                                                                                               | 12,4            | 12,7                                                                                                            | 0,3                                   |
| Non actualisées                                                                                           | 20,0            | 20,7                                                                                                            | 0,8                                   |
| Années de vie pondérées par la qualité (QALY)                                                             |                 |                                                                                                                 |                                       |
| Actualisées                                                                                               | 10,4            | 10,8                                                                                                            | 0,3                                   |
| Non actualisées                                                                                           | 16,5            | 17,4                                                                                                            | 0,9                                   |
| Coûts                                                                                                     |                 |                                                                                                                 |                                       |
| Actualisés                                                                                                | 140 641 \$      | 134 277 \$                                                                                                      | -6365 \$                              |
| Non actualisés                                                                                            | 261 444 \$      | 252 582 \$                                                                                                      | -8862 \$                              |
| Coûts par catégorie (actualisés)                                                                          |                 |                                                                                                                 |                                       |
| Coûts de l'intervention                                                                                   | 0 \$            | 7145 \$                                                                                                         | 7145 \$                               |
| Coûts médicaux de fond                                                                                    | 75 764 \$       | 77 348 \$                                                                                                       | 1584 \$                               |
| Coûts totaux pour les maladies cardiovasculaires                                                          | 36 134 \$       | 22 133 \$                                                                                                       | -14 002 \$                            |
| AVC                                                                                                       | 18 723 \$       | 11 471 \$                                                                                                       | -7251 \$                              |
| Infarctus du myocarde                                                                                     | 8260 \$         | 5059 \$                                                                                                         | -3201 \$                              |
| Angine                                                                                                    | 2166 \$         | 1326 \$                                                                                                         | -840 \$                               |
| Insuffisance cardiaque                                                                                    | 6985 \$         | 4276 \$                                                                                                         | -2709 \$                              |
| Néphropathie chronique                                                                                    | 28 743 \$       | 27 651 \$                                                                                                       | -1092 \$                              |
| Rapport coût-efficacité différentiel par QALY                                                             |                 |                                                                                                                 |                                       |
| Actualisé                                                                                                 |                 |                                                                                                                 | Intervention supérieure               |
| Non actualisé                                                                                             |                 |                                                                                                                 | Intervention supérieure               |
| Rapport coût-efficacité différentiel : analyses de sensibilité à un facteur (par QALY, actualisé)         |                 |                                                                                                                 |                                       |
| Équations de risque de Framingham pour l'effet de la tension artérielle                                   |                 |                                                                                                                 | 28 688 \$                             |
| Réduction de la tension artérielle basée sur l'intervention de portée partielle                           |                 |                                                                                                                 | 12 612 \$                             |
| Estimations des coûts de fond par âge                                                                     |                 |                                                                                                                 | Intervention supérieure               |
| Horizon temporel de 10 ans                                                                                |                 |                                                                                                                 | Intervention cliniquement équivalente |
| Horizon temporel de 5 ans                                                                                 |                 |                                                                                                                 | Intervention cliniquement équivalente |
| Ajout d'un coût doublé de l'intervention des pharmaciens et de coûts de formation de 33,33 \$ par patient |                 |                                                                                                                 | Intervention supérieure               |
| Coûts médicaux annuels de fond réduits dans le groupe bénéficiant de l'intervention                       |                 |                                                                                                                 | Intervention supérieure               |
| Efficacité réduite : 50 % après l'année 3, 100 % après l'année 10                                         |                 |                                                                                                                 | Intervention supérieure               |
| Efficacité réduite : 100 % après l'année 3                                                                |                 |                                                                                                                 | Intervention cliniquement équivalente |
| Scénario « optimiste » concernant le coût d'une intervention de pleine portée                             |                 |                                                                                                                 | Intervention supérieure               |

**FIGURE 3** Diagramme de dispersion dans le plan du rapport coût-efficacité pour les paramètres du scénario de référence dans le modèle avec les interventions de pleine portée et de portée partielle par les pharmaciens

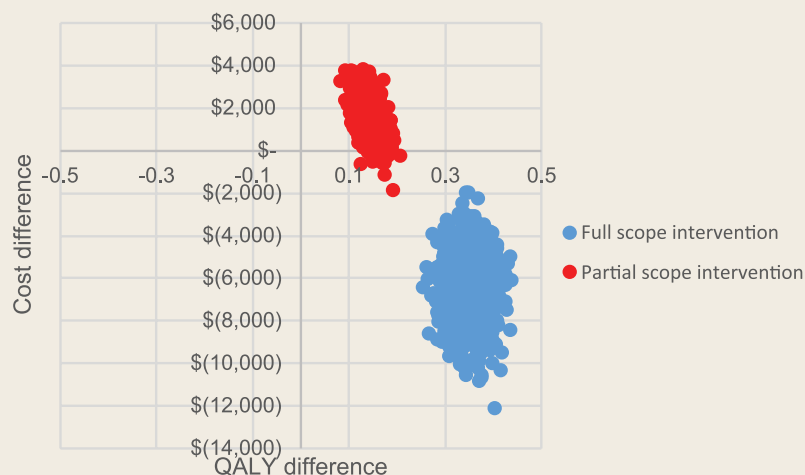

restée plus efficace que le *statu quo* (Tableau 3). Toutefois, pour un horizon temporel plus court (5 ou 10 ans) ou dans l'hypothèse d'une intervention n'ayant plus de bienfaits après 3 ans, les interventions évaluées en QALY ont été cliniquement équivalentes, ce qui laisse croire qu'il faut plus de temps pour obtenir une réduction du nombre de manifestations cliniques et une augmentation correspondante du nombre de QALY. En ce qui a trait aux coûts différentiels, dans environ la moitié des analyses de sensibilité, l'intervention des pharmaciens a continué de coûter moins cher que le *statu quo*. Lorsque l'effet de la tension artérielle sur le risque de MCV a été caractérisé avec les équations de risque de Framingham, ou lorsque l'intervention modélisée a été celle de portée partielle plutôt que de pleine portée, l'intervention a été associée à des coûts médicaux accrus, les rapports coût-efficacité différentiels allant de quelque 12 000 à 29 000 \$. L'annexe supplémentaire fournit d'autres résultats sur les bienfaits cliniques et les économies de coûts pour les analyses de sensibilité à un facteur. Dans l'ensemble des analyses de sensibilité, le nombre d'années de vie gagnées avec l'intervention des pharmaciens (actualisé) a été de 0,0 à 0,3 et le nombre de QALY gagnés, de 0,0 à 0,3. Les coûts actualisés différentiels associés à l'intervention allaient d'économies de coûts de 11 509 \$ à une hausse de 1730 \$. Par conséquent, même si l'ordre de grandeur des bienfaits cliniques et des économies de coûts associés à l'intervention a varié d'une analyse à

l'autre, l'interprétation globale du rapport coût-efficacité (et la supériorité économique potentielle) de l'intervention a été constante.

Lorsque la baisse de la tension artérielle systolique a été de 5 à 20 mm Hg, les effets résultants ont varié d'une manière à peu près linéaire (Figure 4). Pour le nombre différentiel d'années de vie, de QALY et de manifestations cardiovasculaires, des baisses plus fortes de la tension artérielle ont été associées à de plus grandes améliorations, mais l'intervention a invariablement été associée à de meilleurs résultats pour toutes les valeurs évaluées. En ce qui a trait aux coûts différentiels, les coûts de l'intervention n'ont pas été compensés par des coûts médicaux moindres lorsque les réductions de la tension artérielle étaient inférieures à quelque 10 mm Hg; pour des réductions plus importantes, l'intervention est devenue globalement une option plus économique.

## Discussion

Il s'agit de la première étude du rapport coût-efficacité des soins pharmaceutiques de pratique avancée dans la prise en charge (prescription, éducation, consultation) de l'hypertension comparativement aux soins habituels. Dans le scénario de référence qui couvre une période de 30 ans, la prise en charge de l'hypertension par les pharmaciens a été une stratégie financièrement supérieure aux soins habituels, puisqu'elle a été associée à des coûts moindres et à de meilleurs résultats pour la santé, les économies de coûts

**FIGURE 4** Relation entre la réduction de la tension artérielle systolique associée à une intervention des pharmaciens et l'écart différentiel estimatif entre les groupes pour ce qui est des : (a) manifestations cardiovasculaires; (b) années de vie actualisées; (c) années de vie pondérées par la qualité actualisées; (d) coûts médicaux directs actualisés

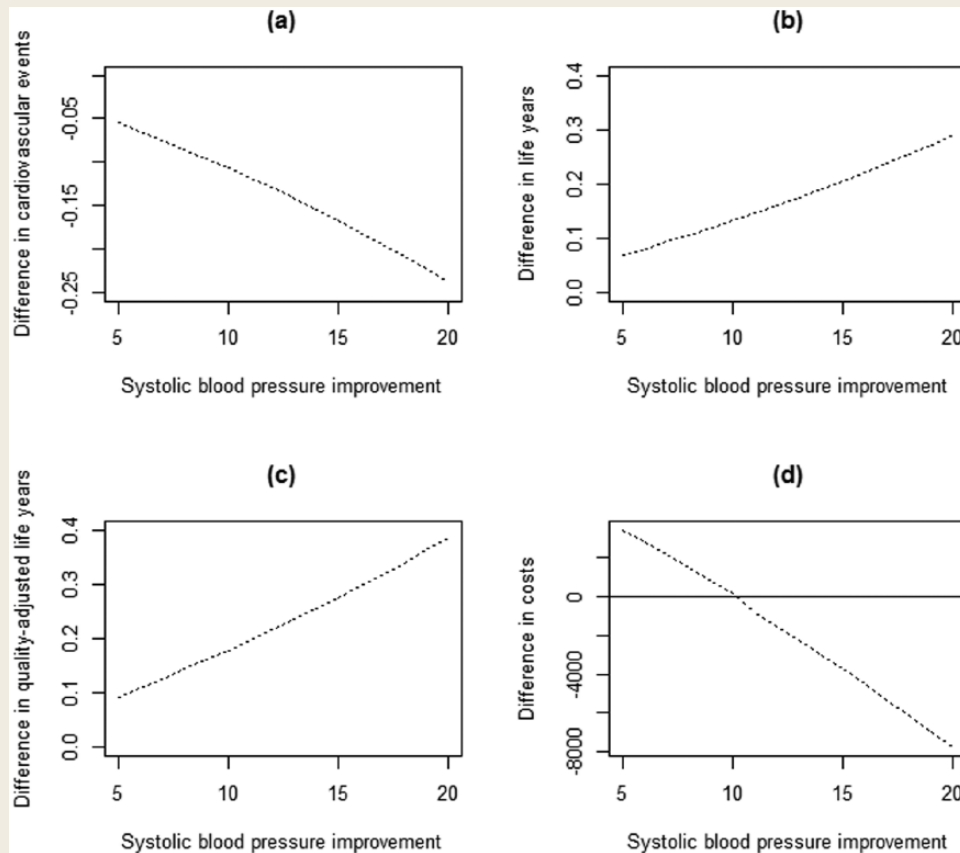

actualisées étant estimées à plus de 6000 \$ par personne. Pour plusieurs stratégies et analyses de sensibilité, les résultats sont restés supérieurs ou, avec des hypothèses de plus en plus prudentes sur l'efficacité de la stratégie, ont continué de montrer que l'intervention serait une dépense judicieuse, bien en-deçà des seuils standards du rapport coût-efficacité. Dans une analyse de sensibilité reposant sur l'hypothèse que l'intervention nécessiterait 2 visites par année après l'an 1 et qu'il n'y aurait pas d'augmentation nette des coûts des médicaments, hypothèse appuyée par des données d'études empiriques<sup>10</sup>, les économies de coûts actualisées estimatives ont grimpé à plus de 11 000 \$ par personne. Ces résultats font ressortir les coûts relativement faibles du programme, surtout par rapport aux coûts du traitement de la MCV ou de la néphropathie terminale. Le scénario de référence prévoyait, à partir d'une extrapolation des résultats observés

au cours des essais, une réduction d'environ 20 % de l'incidence de MCV sur la période de 30 ans. Un tel constat a d'importantes répercussions sur la santé publique, car des stratégies fondées sur les pharmaciens pourraient être envisagées pour aider à combler les lacunes dans les soins contre l'hypertension, et ce, avec un meilleur rapport-efficacité. En fait, l'infrastructure pour de tels services existe déjà. Ce qu'il faut faire maintenant, c'est élargir le champ d'exercice des pharmaciens et inciter les pharmaciens, de façon appropriée, à dispenser ces soins.

Dans les analyses de sensibilité, lorsque l'horizon temporel modélisé se limitait à 5 ou à 10 ans, ou lorsqu'un arrêt de l'intervention était présumé après 3 ans, les rapports coût-efficacité n'ont pu être calculés parce que l'intervention était équivalente au *statu quo* pour ce qui est du nombre de QALY. Il en ressort donc que l'intervention doit être maintenue au fil du temps

pour être efficace et avoir un bon rapport coût-efficacité. L'un des avantages d'une intervention des pharmaciens est l'accès à des soins en temps opportun pour les patients; il est essentiel que les patients continuent d'utiliser régulièrement le service afin d'en retirer des bienfaits pour leur santé. L'intervention particulière modélisée dans le scénario de référence (« intervention de pleine portée par les pharmaciens ») était relativement énergique, comprenant la prescription de médicaments par les pharmaciens en plus d'une revue des médicaments, d'une éducation et de visites de suivi à des intervalles de 1 à 3 mois; la réduction de 18,3 mm Hg de la tension artérielle systolique dans le groupe bénéficiant de l'intervention a été beaucoup plus élevée que celle de 7,6 mm Hg observée pour l'ensemble des groupes ayant bénéficié d'une intervention qui ont été inclus dans la méta-analyse de Santschi et ses collègues<sup>9</sup> (« intervention de portée partielle par les pharmaciens »). Ainsi, les avantages économiques découlant d'une intervention de pleine portée par les pharmaciens représentent probablement une limite supérieure d'économies de coûts et de bienfaits pour la santé qu'une intervention des pharmaciens pourrait permettre d'atteindre. Si des interventions moins énergiques ne procurent pas autant d'avantages, les bienfaits cliniques plus modestes avec l'intervention partielle ont tout de même été associés à de meilleurs résultats pour la santé et à des économies de coûts, l'ordre de grandeur de ces bienfaits étant la principale différence.

Le rapport coût-efficacité de la prestation de soins plus optimaux contre l'hypertension a fait l'objet d'autres études, et les résultats concordent généralement avec ceux de la recherche décrite dans le présent article. Moran et ses collègues<sup>23</sup> ont évalué quel serait le rapport coût-efficacité si l'hypertension était traitée chez les adultes américains conformément aux lignes directrices de 2014<sup>24</sup>. Leur étude de modélisation rigoureuse a produit des résultats similaires : l'application des lignes directrices aux adultes américains âgés entre 35 et 74 ans réduirait le nombre de manifestations cardiovasculaires (environ 56 000 par année aux États-Unis) et les coûts. Les auteurs ont conclu que les interventions des pharmaciens pourraient être une solution pour mettre en œuvre ces lignes directrices dans la population.

Les auteurs d'une autre analyse économique ont modélisé les résultats d'un essai clinique à

répartition aléatoire par grappes (l'essai CAPTION), où une collaboration médecin-pharmacien (intervention de 9 mois ou de 24 mois dans la prise en charge de la tension artérielle) a été comparée aux soins habituels<sup>25,26</sup>. Au cours de cet essai, l'intervention comprenait un historique des médicaments, une évaluation des médicaments antihypertenseurs, une évaluation des obstacles à la maîtrise de la tension artérielle (effets indésirables, non-adhésion), des modifications du mode de vie et des recommandations précises au médecin prescripteur. Les pharmaciens ont été intégrés directement aux cabinets des médecins et pouvaient offrir des consultations en personne. Les principaux résultats de cet essai après 9 mois ont été une réduction de 6,1 mm Hg de la tension artérielle systolique et de 2,9 mm Hg de la tension artérielle diastolique de même qu'une amélioration différentielle de 11 % chez les personnes obtenant une maîtrise de l'hypertension. Des données ont été recueillies seulement pour les coûts associés au professionnel de la santé et aux médicaments antihypertenseurs prescrits, de sorte qu'il ne s'agissait pas d'une évaluation économique complète<sup>27</sup>. Les auteurs ont conclu que les coûts pour une réduction de 1 mm Hg étaient d'environ 39 \$ pour la tension artérielle systolique et de 82 \$ pour la tension artérielle diastolique. En outre, le coût associé à la prestation de soins favorisant la maîtrise de la tension artérielle a été de 22,55 \$ par personne. L'omission de tenir compte des coûts de prise en charge des complications à long terme (MCV, AVC et néphropathie terminale) était une limite importante de cet essai, d'où des résultats vraisemblablement prudents.

Comme pour tout modèle de rapport coût-efficacité, l'hypothèse requise pour l'extrapolation des données d'études en résultats à long terme est une limite importante, et la stratégie globale a été de surmonter cette limite par des analyses déterministes et probabilistes exhaustives et une série d'analyses de seuil. Dans ce modèle, la réduction présumée à long terme du risque de MCV, basée sur un résultat observé après 6 mois, a été une grande source d'incertitude. Dans le scénario de référence, la réduction de 18,3 mm Hg de la tension artérielle systolique pendant 6 mois s'est traduite par une baisse notable du risque de MCV (risque relatif de 0,50 d'après des équations extrapolées des résultats publiés par la BPL Treatment Trialists' Collaboration). L'estimation est fondée sur les données de haute

qualité connues qui sont les plus pertinentes, mais on ignore si cet effet à long terme se concrétiserait dans la pratique clinique réelle. Cela dit, selon d'autres hypothèses reposant sur d'autres sources de données, l'intervention est demeurée une stratégie efficace par rapport au coût en ce qui concerne la baisse de tension artérielle et/ou le risque relatif de MCV qui en résulteraient. Par conséquent, malgré l'incertitude entourant les valeurs exactes des paramètres dans le scénario de référence du modèle et, de ce fait, les résultats numériques, l'interprétation globale d'une stratégie offrant un bon rapport coût-efficacité est robuste pour la totalité des valeurs de paramètres et scénarios plausibles.

En tant que professionnels de la santé accessibles en première ligne, les pharmaciens sont bien placés pour intervenir dans la prise en charge de l'hypertension. Bien que l'ampleur de l'effet soit fonction des particularités de l'intervention, des essais contrôlés à répartition aléatoire ont invariablement montré que l'intervention des pharmaciens est efficace pour réduire la tension artérielle chez les patients hypertendus<sup>9,10</sup>. Comme en témoigne l'évaluation économique présentée dans cet article, cette efficacité clinique laisse présager des économies de coûts ou un meilleur rapport coût-efficacité pour les tiers payeurs de soins de santé, et la mise en œuvre de tels programmes représente donc un bon

rapport qualité-prix. L'élargissement du champ d'exercice des pharmaciens au Canada pourrait s'accompagner d'une révision des barèmes d'honoraires; plus précisément, il pourrait être nécessaire d'intégrer plus d'honoraires désagrégés pour un ensemble d'interventions données. Des analyses du rapport coût-efficacité comme celle présentée dans cet article peuvent aider à établir les honoraires les plus appropriés pour ces services, afin que les pharmaciens reçoivent une juste rémunération pour leur temps et leur expertise, dans le contexte du revenu correspondant pour d'autres éléments des dépenses en services de santé. Comme l'hypertension touche actuellement 7,5 millions de Canadiens<sup>5</sup> et n'est pas bien maîtrisée dans de 35 à 65 % des cas<sup>4,5,28</sup>, la gestion du risque cardiovasculaire – une importante cause de morbidité et de mortalité dans notre société – commande une approche globale et multidisciplinaire. Des données robustes issues d'essais ont confirmé qu'une intervention accrue des pharmaciens est une stratégie efficace pour améliorer la maîtrise de la tension artérielle dans la collectivité, et cette analyse économique connexe démontre que si les personnes adhèrent à une intervention qui met à profit toute l'étendue des services offerts par les pharmaciens, des avantages économiques substantiels pourraient s'ajouter aux améliorations cliniques. ■

*Lieu de travail des auteurs : Faculté de pharmacie (C. Marra), Université d'Otago, Nouvelle-Zélande; Broadstreet Health Economics & Outcomes Research (K. Johnston), Vancouver, Colombie-Britannique; École des sciences infirmières (V. Santschi), Université des sciences appliquées de Suisse occidentale, Suisse; Faculté de médecine et de dentisterie (R.T. Tsuyuki), Université de l'Alberta, Edmonton, Alberta. Personne-ressource : carlo.marra@otago.ac.nz*

**Contributions des auteurs :** C. Marra a conçu et conceptualisé l'étude, a fourni des conseils pour la conception et l'interprétation du modèle et a contribué à la rédaction de l'ébauche et à la révision du manuscrit. K. Johnston a dirigé l'élaboration du modèle et a contribué à la rédaction de l'ébauche et à la révision du manuscrit. V. Santschi a fourni des conseils sur l'interprétation des résultats dans le contexte de la recherche sur le sujet et a contribué à la rédaction de l'ébauche et à la révision du manuscrit. R.T. Tsuyuki a dirigé l'essai qui a été la principale source de données du modèle, a fourni des conseils sur l'interprétation des résultats dans le contexte de la recherche sur le sujet et a contribué à la rédaction de l'ébauche et à la révision du manuscrit. Tous les auteurs ont approuvé la version finale de cet article.

**Déclaration de conflit d'intérêts :** Les auteurs n'ont déclaré aucun conflit d'intérêts potentiel ayant trait à la recherche, à la paternité de cet article et/ou à sa publication.

**Financement :** Les auteurs n'ont reçu aucun soutien financier pour la recherche, la paternité de cet article et/ou sa publication. La recherche a été parrainée par l'Association des pharmaciens du Canada.

## Références

1. Ezzati M, Lopez AD, Rodgers A, *et al.* Selected major risk factors and global and regional burden of disease. *Lancet* 2002;360(9343):1347-60.
2. Zhou B, Bentham J, Di Cesare M, *et al.* Worldwide trends in blood pressure from 1975 to 2015: a pooled analysis of 1479 population-based measurement studies with 19,1 million participants. *Lancet* 2017;389(10064):37-55.
3. World Health Organization. WHO Global Atlas of Cardiovascular Disease. Accessible en ligne au : [www.who.int/cardiovascular\\_diseases/en/](http://www.who.int/cardiovascular_diseases/en/) [en anglais seulement] (consulté le 2 mars 2017).
4. Bakris G, Sarafidis P, Agarwal R, Ruilope L. Review of blood pressure control rates and outcomes. *J Am Soc Hypertens: JASH* 2014;8(2):127-41.
5. Padwal RS, Bienek A, McAlister FA, Campbell NR. Epidemiology of hypertension in Canada: an update. *Can J Cardiol* 2016;32(5):687-94.
6. Kannel WB. Blood pressure as a cardiovascular risk factor: prevention and treatment. *JAMA* 1996;275(20):1571-6.
7. Leung AA, Nerenberg K, Daskalopoulou SS, *et al.* Hypertension Canada's 2016 Canadian Hypertension Education Program guidelines for blood pressure measurement, diagnosis, assessment of risk, prevention and treatment of hypertension. *Can J Cardiol* 2016;32(5):569-88.
8. Yusuf S, Hawken S, Ounpuu S, *et al.* Effect of potentially modifiable risk factors associated with myocardial infarction in 52 countries (the INTERHEART study): case-control study. *Lancet* 2004;364(9438):937-52.
9. Santschi V, Chiolerio A, Colosimo AL, *et al.* Improving blood pressure control through pharmacist interventions: a meta-analysis of randomized controlled trials. *J Am Heart Assoc* 2014;3(2):e000718.
10. Tsuyuki RT, Houle SK, Charrois TL, *et al.* Randomized Trial of the Effect of Pharmacist Prescribing on Improving Blood Pressure in the Community: the Alberta Clinical Trial in Optimizing Hypertension (RxACTION). *Circulation* 2015;132(2):93-100.
11. D'Agostino RB, Sr, Vasan RS, Pencina MJ, *et al.* General cardiovascular risk profile for use in primary care: the Framingham Heart Study. *Circulation* 2008;117(6):743-53.
12. Pencina MJ, D'Agostino RB Sr, Larson MG, *et al.* Predicting the 30-year risk of cardiovascular disease: the Framingham Heart Study. *Circulation* 2009;119(24):3078-84.
13. Framingham Heart Study. *A project of the National Heart, Lung and Blood Institute and Boston University*. Accessible en ligne au : [www.framinghamheartstudy.org](http://www.framinghamheartstudy.org) (consulté le 2 mars 2017).
14. Blood Pressure Lowering Treatment Trialists' Collaboration, Ying A, Arima H, *et al.* Effects of blood pressure lowering on cardiovascular risk according to baseline body-mass index: a meta-analysis of randomised trials. *Lancet* 2015;385(9971):867-74.
15. Hsu CY, McCulloch CE, Darbinian J, *et al.* Elevated blood pressure and risk of end-stage renal disease in subjects without baseline kidney disease. *Arch Intern Med* 2005;165(8):923-8.
16. Chobanian AV, Bakris GL, Black HR, *et al.* Seventh report of the Joint National Committee on Prevention, Detection, Evaluation and Treatment of High Blood Pressure. *Hypertension* 2003;42(6):1206-52.
17. Pocock SJ, McCormack V, Gueyffier F, *et al.* A score for predicting risk of death from cardiovascular disease in adults with raised blood pressure, based on individual patient data from randomised controlled trials. *BMJ* 2001;323(7304):75-81.
18. Sullivan PW, Lawrence WF, Ghushchyan V. A national catalog of preference-based scores for chronic conditions in the United States. *Med Care* 2005;43(7):736-49.
19. The Blood Pressure Lowering Treatment Trialists' Collaboration. Blood pressure-lowering treatment based on cardiovascular risk: a meta-analysis of individual patient data. *Lancet* 2014;384(9943):591-8.
20. Mittmann N, Seung SJ, Hill MD, *et al.* Impact of disability status on ischemic stroke costs in Canada in the first year. *Can J Neurol Sci* 2012;39(6):793-800.
21. Sorensen SV, Kansal AR, Connolly S, *et al.* Cost-effectiveness of dabigatran etexilate for the prevention of stroke and systemic embolism in atrial fibrillation: a Canadian payer perspective. *Thromb Haemost* 2011;105(5):908-19.
22. Bentkover JD, Stewart EJ, Ignaszewski A, *et al.* New technologies and potential cost savings related to morbidity and mortality reduction in Class III/IV heart failure patients in Canada. *Int J Cardiol* 2003;88(1):33-41.
23. McGillion MH, Croxford R, Watt-Watson J, *et al.* Cost of illness for chronic stable angina patients enrolled in a self-management education trial. *Can J Cardiol* 2008;24(10):759-64.
24. Coyle D, Coyle K, Cameron C, *et al.* Cost-effectiveness of new oral anticoagulants compared with warfarin in preventing stroke and other cardiovascular events in patients with atrial fibrillation. *Value Health* 2013;16(4):498-506.
25. Manns BJ, Mendelssohn DC, Taub KJ. The economics of end-stage renal disease care in Canada: incentives and impact on delivery of care. *Int J Health Care Finance Econ* 2007;7(2-3):149-169.
26. Institut canadien d'information sur la santé (ICIS). Tendances des dépenses nationales de santé. Tableau E. 1.16.2. Accessible en ligne au : [https://secure.cihi.ca/free\\_products/nhex\\_trends\\_narrative\\_report\\_2015\\_fr.pdf](https://secure.cihi.ca/free_products/nhex_trends_narrative_report_2015_fr.pdf) (consulté le 2 mars 2017).
27. Canadian Pharmacists Association. 2016 fees and claims data for government-sponsored pharmacist services, by province. 2016. Accessible en ligne au : [www.cfpnet.ca/bank/document\\_en/84-2015-provincial-chart.pdf](http://www.cfpnet.ca/bank/document_en/84-2015-provincial-chart.pdf) [en anglais seulement] (consulté le 2 mars 2017).
28. Tsuyuki RT, Al Hamarneh YN, Jones CA, Hemmelgarn BR. The effectiveness of pharmacist interventions on cardiovascular risk: the multicenter randomized controlled RxE-ACH Trial. *J Am Coll Cardiol* 2016;67(24):2846-54.
29. Statistique Canada. Tableau 326-0021. Indice des prix à la consommation. 2002. Accessible en ligne au : <http://www5.statcan.gc.ca/cansim/a26j;sessionid=ECB8045E8E6653F2E>

11DE3B8A6B4CB1A?id=3260021&lang=fra&retrLang=fra (consulté le 2 mars 2017).

30. Moran AE, Odden MC, Thanataveerat A, *et al.* Cost-effectiveness of hypertension therapy according to 2014 guidelines. *N Engl J Med* 2015;372(5):447-55.

31. James PA, Oparil S, Carter BL, *et al.* 2014 evidence-based guideline for the management of high blood pressure in adults: report from the panel members appointed to the Eighth Joint National Committee (JNC 8). *JAMA* 2014;311(5):507-20.

32. Carter BL, Coffey CS, Ardery G, *et al.* A cluster-randomized trial of a physician/pharmacist collaborative model to

improve blood pressure control. *Circ Cardiovasc Qual Outcomes* 2015;8(3):235-43.

33. Polgreen LA, Han J, Carter BL, *et al.* Cost effectiveness of a physician-pharmacist collaboration intervention to improve blood pressure control. *Hypertension* 2015;66(6):1145-51.

34. Drummond M, Sculpher M, Torrance G, *et al.* *Methods for the economic evaluation of health care programmes*. 3rd ed. Oxford (UK): Oxford University Press; 2005.

35. Leenen FH, Dumais J, McInnis NH, *et al.* Results of the Ontario survey on the prevalence and control of hypertension. *CMAJ* 2008;178(11):1441-9.
